# Supplementary figures and images for: Improvement of natural graphite as a lithium-ion battery anode material, from raw flake to carbon-coated sphereElectronic supplementary information (ESI) available: colour versions of Figs. 6, 8 and 9. See http://www.rsc.org/suppdata/jm/b3/b316702j/
Source: Royal Society of Chemistry journal article supplement (doi:10.1039/b316702j), 2004-01-01

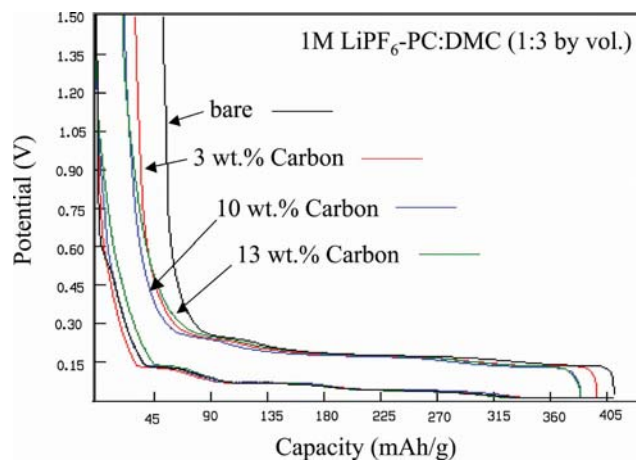

Supplement: b316702j-f6.pdf [file b316702j-f6.pdf]

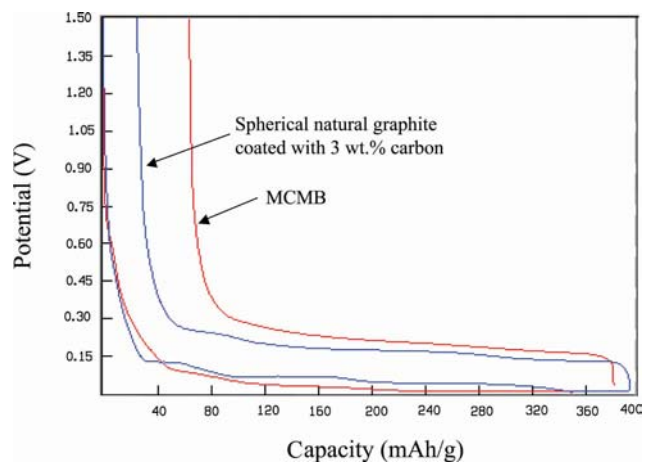

Supplement: b316702j-f8.pdf [file b316702j-f8.pdf]

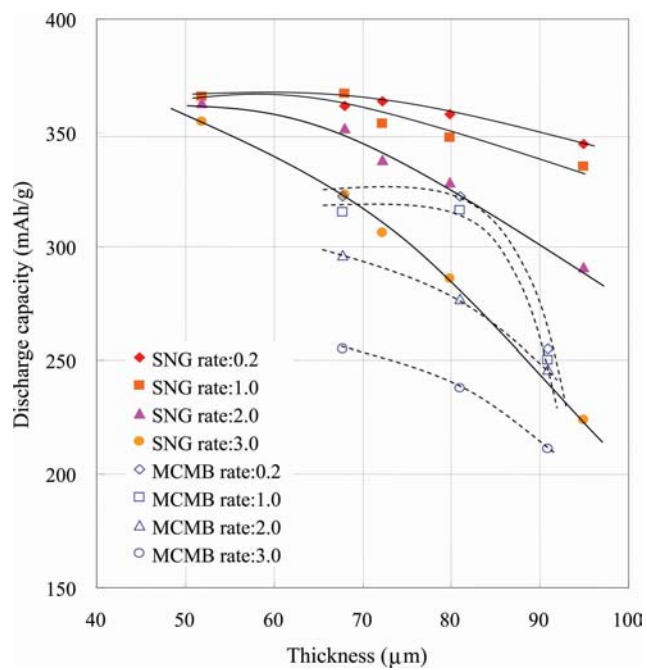

Supplement: b316702j-f9.pdf [file b316702j-f9.pdf]
